# Supplementary material for: Complementary and Alternative Medicine Use in Amyotrophic Lateral Sclerosis Cases in South Korea
Source: Evid Based Complement Alternat Med. 2019 Jul 25;2019:4217057. doi: 10.1155/2019/4217057 (PMC6683772; doi:10.1155/2019/4217057)
Supplement: Supplementary Materials — Supplementary Appendix 1: a questionnaire survey conducted to understand the treatment behaviours relating to ALS and muscle dystrophy in ALS patients. Based on the results of this survey, we aimed to ascertain the precise state of methods used by ALS patients in Korea to treat the disease and improve health, hoping that data will be used to establish policies that improve treatments for ALS patients in Korea. Supplementary Appendix 2: prevalence of CAM use by CAM type (n = 195). Supplementary Appendix 3: used modalities in dietary treatments (n = 46). [file 4217057.f1.zip]

Archive with 2 entries (2 files):
- 4217057.f1/Supplemental Appendix 1.docx
- 4217057.f1/Supplemental Appendix 2-3.docx
